# Supplementary material
Source: Elsevier journal article supplement (https://comptes-rendus.academie-sciences.fr/chimie/article/10.1016/j.crci.2015.11.012/file/attach/mmc1.pdf)

## Supporting Information

**Oxidation of bis-Sulfinyl Carbanion as the Pivot of Ionic/Radical Tandem Reactions**

**Réactions tandem ioniques/radicalaires fondées sur l'oxydation de carbanion bis-sulfinyle**

**Guillaume Vincent,<sup>[a]</sup> Saloua Cheli,<sup>[a]</sup> Rocio Martinez Mallorquin,<sup>[a]</sup> Adi Abramovitch,<sup>[b]</sup> Sophie Beauvière,<sup>[a]</sup> Catherine Gomez,<sup>[a]</sup> Franck Brebion,<sup>[a]</sup> Ilan Marek,<sup>[b]</sup> Max Malacria,<sup>[a]</sup> Jean Philippe Goddard\*<sup>[a]</sup> and Louis Fensterbank\*<sup>[a]</sup>**

[a] Sorbonne Universités UPMC Univ Paris 06, UMR CNRS 8232, Institut Parisien de Chimie Moléculaire, 4 place Jussieu, C.229, F-75005 Paris, France  
Fax: +33-1-44277360

[b] Schulich Faculty of Chemistry, Technion - Israel Institute of Technology, Haifa 32000, Israel  
Fax: +972-4-8293709

### Contents

|                                             |         |
|---------------------------------------------|---------|
| <b>Procedures and spectral data</b>         | 1 - 13  |
| <b>X-ray parameters and ellipsoid plots</b> | 13 - 17 |

**Generalities:** All reactions were run under an argon or nitrogen atmosphere in anhydrous solvents and dried flasks. Thin layer chromatography (TLC) was performed on Merck silica gel 60 F 254 and revealed with either an ultraviolet lamp (254 nm) or a *p*-anisaldehyde solution. Flash column chromatography was performed with Silica gel Merck Geduran SI (40-63 nm). Solvents were systematically distilled prior to be used. TEMPO was sublimated under vacuum (80 °C, 0.05 atm) prior to be used. IR spectra were recorded on a Bruker Tensor 27. <sup>1</sup>H and <sup>13</sup>C NMR spectra were recorded at room temperature at 400 MHz and 100 MHz respectively on an ARX400 Bruker spectrometer. Shifts are given in ppm and referenced from the solvent residual signal (7.26 ppm for CDCl<sub>3</sub>) for proton NMR. For carbon NMR, shifts are referenced from the solvent central peak (77.16 ppm for CDCl<sub>3</sub>). Coupling constants (*J*) are given in Hertz (Hz). The letters m, s, d, t, q, hept mean respectively multiplet, singlet, doublet, triplet, quadruplet, heptuplet. Optical rotations were measured on a Perkin Elmer 343 polarimeter. Exact Masses were performed by the Plateforme de Spectrométrie masse (IPMC UMR7201). Melting points were obtained on a Reichert apparatus and are uncorrected.

Compounds **6**, **7**, **1a-c**, **9aa**, **9ab**, **9ba**, **9ca** have been previously described.<sup>1,2</sup>

**General procedure A for the tandem alkoxide or carbamate addition /radical cyclisation (ionic add. -40°C / ox. -40°C to -20°C).**

To a solution of allyl alcohol **8a,b** or *N*-Boc allyl amine **18a,b** (1.7 eq.) in anhydrous THF (0.2M), cooled to 0°C, is added dropwise *n*-BuLi (1.75 eq.) and the solution is stirred for 30 min at this temperature. Then, the solution is cooled to -40°C and the alkylidene bis-sulfoxide **1a-f** or bis-sulfone (1 eq.) **10a,b** is added as an anhydrous THF (1M) solution. The reaction is stirred for 1 h (disappearance of starting material monitored by TLC). TEMPO (2 eq.) and ferrocenium tetrafluoroborate (3 eq.) are added in one portion at -40°C. The reaction is then warmed up to -20°C and after 2 hours at -20°C, the reaction is hydrolyzed by a saturated aqueous solution of NH<sub>4</sub>Cl. The crude mixture is extracted with Et<sub>2</sub>O and the resulting organic phases are dried over anhydrous MgSO<sub>4</sub>, filtered and the solvent is removed under vacuum. The crude is purified by flash chromatography over silica gel.

**General procedure B for the tandem enolate addition/radical cyclisation**

To a solution of di-*iso*-propylamine (2.4 eq.) in anhydrous THF (0.3M), cooled to 0°C, is added dropwise *n*-BuLi (2.7 eq.) and the solution is stirred for 30 min at this temperature. Then, the solution is cooled to -78°C and the ester (2 eq.) is added as an anhydrous THF (1M) solution. The reaction is stirred 45 min at -78°C and alkylidene bis-sulfoxide **1** (1 eq.) is added as an anhydrous THF (0.3M) solution. The reaction is stirred 1.5 h (disappearance of starting material monitored by TLC, diethyl ether/petroleum ether: 8/2). TEMPO (3 eq.) and ferrocenium tetrafluoroborate (3.5 eq.) are added in one portion at -78°C. The reaction is warmed up to -20°C over 30 min and after 2 hours at -20 °C, the reaction is hydrolyzed by a saturated aqueous solution of NH<sub>4</sub>Cl. The crude mixture is extracted with Et<sub>2</sub>O and the resulting organic phases are dried over anhydrous MgSO<sub>4</sub>, filtered and the solvent is removed under vacuum. The crude is purified by flash chromatography over silica gel.

<sup>1</sup> (a) B. Delouvrié, F. Najera, L. Fensterbank, M. Malacria *J. Organometallic Chem.* **2002**, 643-644, 130-135. (b) F. Brebion, B. Delouvrié, F. Najera, L. Fensterbank, M. Malacria, J. Vaissermann, *Angew. Chem. Int. Ed.*, **2003**, 42, 5342-5345. (c) F. Brebion, J.-P. Goddard, C. Gomez, L. Fensterbank, M. Malacria, *Synthesis*, **2005**, 2449.

<sup>2</sup> J.-P. Goddard, C. Gomez, F. Brebion, S. Beauvière, L. Fensterbank, M. Malacria *Chem. Commun.* **2007**, 2929-2931.

### General procedure **C** for the allylic oxidation

To a solution of *t*-BuOK (1.5 eq.) in anhydrous THF (0.2M), cooled to -40°C, is added dropwise the alkylidene bis-sulfoxide **1** (1 eq.) as an anhydrous THF solution (1M). The reaction is stirred for 1 h at -40°C and 30 min at -20°C. TEMPO (2 eq.) and ferrocenium tetrafluoroborate (3 eq.) are added in one portion. After 2 hours at -20 °C, the reaction is hydrolyzed by a saturated aqueous solution of NH<sub>4</sub>Cl. The crude mixture is extracted with Et<sub>2</sub>O and the resulting organic phases are dried over anhydrous MgSO<sub>4</sub>, filtered and the solvent is removed under vacuum. The crude is purified by flash chromatography over silica gel.

### General procedure **D** for the tandem cuprate addition/allylic oxidation

To a suspension of Cu salt (CuI or CuBr.DMS) (4 eq.) in anhydrous THF (0.2M), cooled to -10°C, is added dropwise the Grignard or lithium reagent (3.5 eq.) and the solution is stirred for 30 min at this temperature. Then, the solution is cooled to -65°C and the vinylidene bis-sulfoxide **1** (1 eq.) is added as an anhydrous THF solution. The reaction is allowed to warm up to -15°C over 1 h. TEMPO (4 eq.) and ferrocenium tetrafluoroborate (4 eq.) are added in one portion. After 2 hours at -15 °C, the reaction is hydrolyzed by a saturated aqueous solution of NH<sub>4</sub>Cl. The crude mixture is extracted with Et<sub>2</sub>O and the resulting organic phases are dried over anhydrous MgSO<sub>4</sub>, filtered and the solvent is removed under vacuum. The crude is purified by flash chromatography over silica gel.

### Bis-sulfone **10a**.

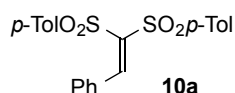

Procedure from literature.<sup>3</sup> A mixture of benzaldehyde (570 μL, 5.6 mmol), bis(tolylsulfonyl)methane (2 g, 6.16 mmol), diethylammonium chloride (1.2 g, 10.6 mmol) and potassium fluoride (49 mg, 0.84 mmol) in dry toluene (26 mL) is heated at reflux with a Dean Stark for 24 h. After cooling, the solvent is evaporated and the residue is partitioned between water (20 mL) and CH<sub>2</sub>Cl<sub>2</sub> (60 mL). The organic phase is separated and the aqueous phase is extracted with CH<sub>2</sub>Cl<sub>2</sub> (3×50 mL). The combined organic layer is dried over Na<sub>2</sub>SO<sub>4</sub>, filtered and concentrated under reduced pressure. The crude is purified by flash chromatography over silica gel (pentane/ethyl acetate: from 10/0 to 8/2) to afford **10a** as a yellow powder (580 mg, 25 %): IR (neat) 3064, 2923, 1595, 1305, 1121, 1211, 912, 811. <sup>1</sup>H NMR (400 MHz, CDCl<sub>3</sub>) δ 8.62 (s, 1H), 7.92 (d, *J* = 8.3 Hz, 2H), 7.51-7.34 (m, 9H), 7.09 (d, *J* = 8.1 Hz, 2H), 2.47 (s, 3H), 2.34 (s, 3H). <sup>13</sup>C NMR (100 MHz, CDCl<sub>3</sub>) δ 151.2, 145.0, 144.6, 137.4, 136.8, 133.5, 131.0, 130.3, 129.6, 129.2, 128.9, 128.1, 128.0, 21.7, 21.6. HRMS: Calc. for C<sub>22</sub>H<sub>20</sub>O<sub>4</sub>S<sub>2</sub>Na [M+Na]<sup>+</sup> 435.0695, found 435.0690.

### Bis-sulfone **10b**.

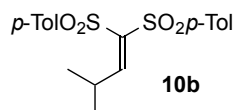

To *iso*-propylidene bis-sulfoxide **1b** (1.15 g, 3.3 mmol) in ether (15 mL), was added *m*CPBA (1.36 g, 5.94 mmol) portionwise at 0°C. After stirring 15 h at 0°C, the reaction is hydrolyzed

<sup>3</sup> Sulzer-Mossé, S.; Alexakis, A.; Mareda, J.; Bollot, G.; Bernardinelli, G.; Filinchuk, Y. Chem. Eur. J. 2009, 15, 3204-3220.

by a saturated aqueous solution of  $\text{NaHCO}_3$ . The crude mixture is extracted with AcOEt (3x10 mL) and the resulting organic phases are dried over anhydrous  $\text{MgSO}_4$ , filtered and the solvent is removed under vacuum. The crude is purified by flash chromatography over silica gel (pentane/diethyl ether: from 9/1 to 8/2) to afford **10b** as a white amorphous powder (287.0 mg, 23%): IR (neat) 2961, 2927, 2871, 1726, 1336, 1316, 1290, 1144, 1082, 913, 813, 691, 630.  $^1\text{H}$ NMR ( $\text{CDCl}_3$ , 400 MHz)  $\delta$  7.89 (d,  $J = 8.3$  Hz, 2H), 7.83 (d,  $J = 8.3$  Hz, 2H), 7.49 (d,  $J = 11.6$  Hz, 1H), 7.34 (d,  $J = 8.3$  Hz, 2H), 7.32 (d,  $J = 8.3$  Hz, 2H), 3.59 (m, 1H), 2.44 (s, 3H), 2.43 (s, 3H), 1.02 (d,  $J = 6.6$  Hz, 6H).  $^{13}\text{C}$ NMR ( $\text{CDCl}_3$ , 100 MHz)  $\delta$  163.2, 145.4, 145.0, 142.5, 138.5, 137.2, 129.9, 129.8, 128.9, 128.1, 29.1, 21.8, 21.3. HRMS: Calc. for  $\text{C}_{19}\text{H}_{22}\text{O}_4\text{S}_2\text{Na}$   $[\text{M}+\text{Na}]^+$  401.0852, found 401.0851.

### Tetrahydrofurane 11a.

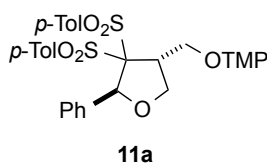

Procedure **A** with benzylidene bis-sulfone **10a** (329.0 mg, 0.74 mmol) afforded **11a** as a white foam (360.0 mg, 78%): IR (neat) 2931, 2929, 1359, 1332, 1257, 1145, 1077, 1058, 907, 807.  $^1\text{H}$  NMR ( $\text{CDCl}_3$ , 400 MHz)  $\delta$  8.19 (d,  $J = 8.4$  Hz, 2H), 7.86 (d,  $J = 8.4$  Hz, 2H), 7.50 (d,  $J = 8.4$  Hz, 2H), 7.27 (d,  $J = 8.4$  Hz, 2H), 7.15 (t,  $J = 7.2$  Hz, 1H), 7.05 (t,  $J = 7.6$  Hz, 2H), 6.62 (d,  $J = 8.0$  Hz, 2H), 5.78 (s, 1H), 4.68 (t,  $J = 7.6$  Hz, 1H), 4.41 (dd,  $J = 10.8$ ; 9.2 Hz, 1H), 4.21 (dd,  $J = 8.5$ ; 8.4 Hz, 1H), 3.66 (dd,  $J = 8.8$ ; 3.6 Hz, 1H), 3.49-3.56 (m, 1H), 2.56 (s, 3H), 2.40 (s, 3H), 1.07-1.40 (m, 15H), 0.74 (s, 3H).  $^{13}\text{C}$ NMR ( $\text{CDCl}_3$ , 100 MHz): 146.6, 145.4, 136.1, 135.1, 134.4, 133.0, 131.6, 129.6, 129.4, 128.1, 128.0, 126.9, 96.7, 86.0, 72.9, 72.1, 59.8, 59.7, 49.7, 39.7, 33.0, 32.9, 21.8, 21.6, 20.0, 20.0, 17.1. HRMS: Calc. for  $\text{C}_{34}\text{H}_{43}\text{O}_6\text{NS}_2$   $[\text{M}+\text{H}]^+$  626.2604, found 626.2600.

### Tetrahydrofurane 11b.

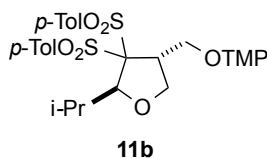

Procedure **A** with *iso*-propylidene bis-sulfone **10b** (128.0 mg, 0.338 mmol) afforded **11b** as a white foam (149 mg, 74%): IR (neat) 2929, 1721, 1596, 1470, 1374, 1334, 1141, 1079, 972, 806, 666, 568.  $^1\text{H}$ NMR ( $\text{CDCl}_3$ , 400 MHz)  $\delta$  8.10 (d,  $J = 8.4$  Hz, 2H), 8.07 (d,  $J = 8.4$  Hz, 2H), 7.39 (d,  $J = 8.4$  Hz, 2H), 7.37 (d,  $J = 8.4$  Hz, 2H), 4.51 (t,  $J = 7.5$  Hz, 1H), 4.31-4.26 (m, 2H), 3.88 (dd,  $J = 10.6$ ; 8.4 Hz, 1H), 3.50 (dd,  $J = 9.0$ ; 3.6 Hz, 1H), 3.36-3.28 (m, 1H), 2.51-2.45 (m, 1H), 2.48 (s, 3H), 2.44 (s, 3H), 1.50-1.19 (m, 6H), 1.07 (br s, 3H), 1.04 (d,  $J = 6.6$  Hz, 3H), 1.00 (br s, 3H), 0.99 (br s, 3H), 0.58 (br s, 3H), 0.43 (d,  $J = 6.8$  Hz, 3H).  $^{13}\text{C}$ NMR ( $\text{CDCl}_3$ , 100 MHz)  $\delta$  143.9, 143.1, 133.8, 132.6, 130.1, 139.5, 127.1, 126.8, 93.6, 90.4, 70.4, 69.3, 57.2, 57.1, 47.6, 37.2, 30.4, 30.2, 26.1, 19.5, 19.3, 18.8, 17.7, 17.4, 17.4, 14.5. HRMS: Calc. for  $\text{C}_{31}\text{H}_{46}\text{O}_6\text{NS}_2$   $[\text{M}+\text{H}]^+$  592.2761, found 592.2749.

### Reduction of **9aa** with $\text{SmI}_2$

To a freshly prepared solution of  $\text{SmI}_2$  in THF (0.1 M, 1.51 mmol) and HMPA (262  $\mu\text{L}$ , 1.51 mmol) is added a solution of **9aa** (128 mg, 0.215 mmol) and *t*-BuOH (144  $\mu\text{L}$ , 1.51 mmol) in THF. The reaction mixture is stirred at RT with monitoring by TLC. The reaction is usually

complete within 2-3 h. After quenching with a saturated aq.  $\text{NH}_4\text{Cl}$  solution, the crude mixture is extracted with EtOAc. The combined organic phases are washed with brine and dried over  $\text{MgSO}_4$  and concentrated under vacuum. The crude is purified by flash chromatography over silica gel. The crude is purified by flash chromatography over silica gel (pentane/ethyl acetate: from 10/0 to 7/3) to afford **14** (42 mg, 43%) and (S)-**16** (23 mg, 33%) and **15** (5 mg, 5%) by order of elution.

#### Tetrahydrofuran **14**.

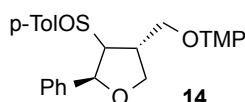

Viscous oil.  $\alpha_D = 18^\circ$  (c 1.05,  $\text{CHCl}_3$ ). IR (neat) 3066, 3003, 2977, 1596, 1541, 1493, 1360, 1084, 812.  $^1\text{H}$  NMR (400 MHz,  $\text{CDCl}_3$ )  $\delta$  7.25-7.06 (m, 9H), 5.04 (d,  $J = 6.6$ , 1H), 4.47 (m, 1H), 3.97 (dd,  $J = 4.3, 6.6$  Hz, 1H), 3.82 (m, 3H), 3.29 (m, 1H), 2.35 (s, 3H), 1.09-1.44 (m, 18H).  $^{13}\text{C}$  NMR (100 MHz,  $\text{CDCl}_3$ )  $\delta$  140.9, 140.0, 136.8, 129.9, 128.6, 128.4, 127.2, 124.1, 83.3, 77.2, 76.5, 71.7, 71.1, 60.0, 39.6, 33.6, 21.3, 20.2, 17.0. HRMS: Calc. for  $\text{C}_{27}\text{H}_{37}\text{N}_1\text{O}_3\text{S}_1\text{Na}$   $[\text{M}+\text{Na}]^+$  478.2386, found 478.2376.

#### Vinylsulfoxide **15**.

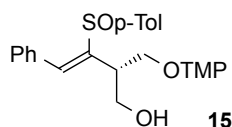

Viscous oil.  $\alpha_D = -350^\circ$  (c 1.05,  $\text{CHCl}_3$ ). IR (neat) 3420, 3058, 2973, 2928, 2871, 1573, 1359, 1079, 809, 732.  $^1\text{H}$  NMR (400 MHz,  $\text{CDCl}_3$ )  $\delta$  7.42 (d,  $J = 8.0$  Hz, 2H), 7.31-7.16 (m, 5H), 7.18 (d,  $J = 8.0$  Hz, 2H), 6.35 (s, 1H), 4.04 (d,  $J = 7.2$  Hz, 2H), 3.91-3.77 (m, 2H), 3.66 (p,  $J = 7.0$  Hz, 1H), 2.38 (s, 3H), 2.01 (m, 1H), 1.55-1.08 (m, 18H).  $^{13}\text{C}$  NMR (100 MHz,  $\text{CDCl}_3$ )  $\delta$  139.1, 138.4, 136.9, 134.1, 130.7, 130.2, 129.1, 128.5, 128.2, 126.7, 75.8, 69.5, 59.9, 44.3, 39.7, 33.0, 32.8, 29.6, 20.2, 17.0.

#### Alkene **16**.

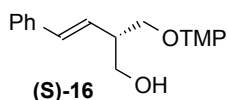

Oil.  $\alpha_D = -85^\circ$  (c 0.09,  $\text{CHCl}_3$ ). IR (neat) 3357, 3004, 2927, 1491, 1359, 913, 747.  $^1\text{H}$  NMR (400 MHz,  $\text{CDCl}_3$ )  $\delta$  7.36-7.22 (m, 5H), 6.51 (d,  $J = 16.0$  Hz, 1H), 6.13 (dd,  $J = 16.0$  Hz ; 8.0 Hz, 1H), 4.00-3.75 (m, 4H), 2.77 (m, 1H), 2.28 (s, 1H, OH), 1.46-1.11 (m, 18H).  $^{13}\text{C}$  NMR (100 MHz,  $\text{CDCl}_3$ )  $\delta$  137.3, 132.4, 128.6, 127.6, 127.5, 126.2, 79.4, 65.7, 60.1, 45.3, 39.8, 33.3, 33.1, 17.1. HRMS: Calc. for  $\text{C}_{20}\text{H}_{31}\text{N}_1\text{O}_2$   $[\text{M}+\text{H}]^+$  318.2428, found 318.2420.

#### Tetrahydrofuran **17**.

Reduction of **11a** (100 mg, 0.16 mmol) with  $\text{SmI}_2$  was accomplished with the same procedure as from **9aa** and afforded rac-**16** (7mg, 28%) and **17** (8 mg, 21%) by order of elution.

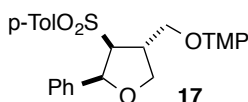

White paste. IR (neat) 2974, 2928, 2870, 1597, 1494, 1360, 1183, 1146, 813.  $^1\text{H}$  NMR (400 MHz,  $\text{CDCl}_3$ )  $\delta$  7.25-7.06 (m, 9H), 5.04 (d,  $J = 6.6$  Hz, 1H), 4.47 (m, 1H), 3.97 (dd,  $J = 6.6$ ; 4.3 Hz, 1H), 3.82 (m, 3H), 3.29 (m, 1H), 2.35 (s, 3H), 1.44-1.09 (m, 18H).  $^{13}\text{C}$  NMR (100 MHz,  $\text{CDCl}_3$ )  $\delta$  143.8, 136.5, 135.2, 129.5, 127.9, 127.8, 127.7, 82.4, 75.8, 69.5, 69.2, 60.2, 41.6, 39.7, 33.5, 33.2, 21.6, 20.4, 20.3, 17.1.

### Synthesis of the dihydropyrroles **19**.

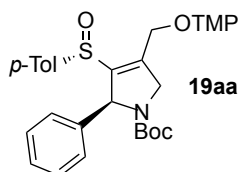

Procedure **A** with benzylidene bis-sulfoxide **1a** (136.0 mg, 0.288 mmol) afforded the desired compound **19aa** as a white foam (114.0 mg, 55%) and as 2 rotamers in solution:  $[\alpha]_{\text{D}} = +40.5$  (c 1.24  $\text{CHCl}_3$ ). IR (neat) 2974, 2929, 1699, 1391, 1260, 1168, 1127, 1083, 1045, 807, 763, 698.  $^1\text{H}$ NMR ( $\text{CDCl}_3$ , 400 MHz)  $\delta$  6.98-6.84 (m, 9H), 5.75 (d,  $J = 4.5$  Hz, 0.8 H), 5.69 (br, 0.2H), 4.96 (d,  $J = 12.6$  Hz, 0.8H), 4.92 (1/2AB,  $J_{\text{AB}} = 12.1$  Hz, 0.2H), 4.79 (1/2AB,  $J_{\text{AB}} = 12.6$  Hz, 1H), 4.65 (1/2AB,  $J_{\text{AB}} = 16.8$  Hz, 1H), 4.58 (dd,  $J = 16.8$ ; 4.5 Hz, 1H), 2.26 (s, 0.6 H), 2.22 (s, 2.4H), 1.49-1.33 (m, 6H), 1.25 (br s, 3H), 1.24 (br s, 3H), 1.15-1.13 (br s, 15H).  $^{13}\text{C}$ NMR ( $\text{CDCl}_3$ , 100 MHz)  $\delta$  153.7, 142.5, 140.2, 140.0, 139.9, 137.7, 129.3, 127.9, 127.7, 127.0, 123.4, 80.3, 71.0, 65.7, 60.3, 55.7, 39.7, 33.3, 33.1, 28.1, 28.5, 21.2, 20.3, 20.2, 17.0. HRMS: Calc. for  $\text{C}_{32}\text{H}_{45}\text{N}_2\text{O}_4\text{S}$   $[\text{M}+\text{H}]^+$  553.3100, found 553.3094.

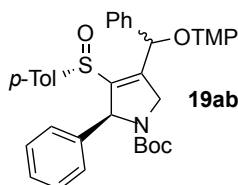

Procedure **A** with benzylidene bis-sulfoxide **1a** (150.0 mg, 0.394 mmol) afforded a white foam of the desired compound **19ab** (139.5 mg, 56%) that evolved to a 1:1 mixture of 2 diastereoisomers (2 rotamers for each in solution) after standing 24 h in  $\text{CDCl}_3$  at rt: IR (neat) 2930, 1697, 1493, 1390, 1242, 1167, 1126, 1048, 809, 753, 667.  $^1\text{H}$ NMR ( $\text{CDCl}_3$ , 400 MHz)  $\delta$  7.63 (d,  $J = 7.3$  Hz, 1H), 7.50-6.95 (m, 10H), 6.89-6.85 (m, 2H), 6.66 (d,  $J = 7.3$  Hz, 1H), 6.45 (s, 0.5H), 6.37 (s, 0.5H), 5.68 (d,  $J = 5.0$  Hz, 0.5H), 5.40 (dd,  $J = 5.2$ ; 1.8 Hz, 0.5H), 4.82 (dd,  $J = 16.9$ ; 5.2 Hz, 0.5H), 4.81 (1/2AB,  $J_{\text{AB}} = 16.8$  Hz, 0.5H), 4.50 (dd,  $J = 16.8$ ; 5.0 Hz, 0.5H), 4.46 (dd,  $J = 16.9$ , 1.8 Hz, 0.5H), 2.34 (s, 1.5H), 2.25 (s, 1.5H), 1.61-1.15 (m, 15H), 1.14 (br s, 4.5H), 1.11 (br s, 4.5H), 0.87 (s, 1.5H), 0.82 (s, 1.5H).  $^{13}\text{C}$ NMR ( $\text{CDCl}_3$ , 100 MHz)  $\delta$  153.3, 153.2, 149.9, 147.3, 140.8, 140.3, 140.2, 140.1, 139.9, 136.8, 136.7, 136.4, 136.2, 128.9, 128.8, 128.4, 128.3, 127.7, 127.4, 127.3, 127.2, 126.9, 126.4, 126.3, 125.2, 124.3, 82.3, 79.8, 79.7, 66.0, 64.9, 59.9, 59.8, 59.5, 59.4, 53.0, 40.0, 39.9, 39.8, 33.6, 33.5, 33.4, 33.3, 28.0, 27.6, 21.0, 20.9, 20.3, 20.0, 19.9, 16.7. HRMS: Calc. for  $\text{C}_{38}\text{H}_{49}\text{N}_2\text{O}_4\text{S}$   $[\text{M}+\text{H}]^+$  629.3413, found 629.3390.

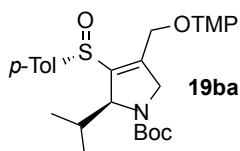

Procedure **A** with *iso*-propylidene bis-sulfoxide **1b** (140.0 mg, 0.400 mmol) afforded the desired compound **19ba** as a white foam (120.7 mg, 58%) and as 2 rotamers in solution:  $[\alpha]_D = +17.4$  (c = 0.47 CHCl<sub>3</sub>). IR (neat) 2970, 2930, 1697, 1456, 1356, 1256, 1167, 1116, 1083, 1049, 958, 878, 808, 770, 735, 621. <sup>1</sup>HNMR (CDCl<sub>3</sub>, 400 MHz)  $\delta$  7.50 (d, *J* = 8.0 Hz, 2H), 7.28 (d, *J* = 8.0 Hz, 2H), 4.96 (br, 0.8H), 4.88 (br, 0.2H), 4.85 (1/2AB, *J*<sub>AB</sub> = 12.9 Hz, 1H), 4.76 (1/2AB, *J*<sub>AB</sub> = 12.9 Hz, 1H), 4.67 (1/2AB, *J*<sub>AB</sub> = 16.9 Hz, 0.8H), 4.47 (1/2AB, *J*<sub>AB</sub> = 16.8 Hz, 0.2H), 4.11 (dd, *J* = 16.8; 3.6 Hz, 1H), 2.39 (s, 3H), 1.49-1.04 (m, 7H), 1.43 (br s, 9H), 1.21 (s, 3H), 1.19 (s, 3H), 1.12 (s, 3H), 1.09 (s, 3H), 0.85 (d, *J* = 6.8 Hz, 3H), 0.32 (d, *J* = 6.7 Hz, 3H). <sup>13</sup>CNMR (CDCl<sub>3</sub>, 100 MHz)  $\delta$  155.3, 144.7, 141.0, 139.0, 138.7, 130.0, 129.7, 124.9, 124.3, 80.7, 71.2, 70.9, 67.2, 60.3, 60.1, 57.1, 39.6, 33.3, 33.1, 33.0, 28.6, 21.5, 21.2, 20.5, 20.3, 17.1, 15.4. HRMS: Calc. for C<sub>29</sub>H<sub>47</sub>N<sub>2</sub>O<sub>4</sub>S [M+H]<sup>+</sup> 519.3257, found 519.3276.

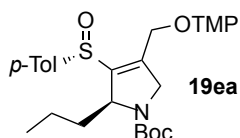

Procedure **A** with *n*-propylidene bis-sulfoxide **1e** (100.0 mg, 0.288 mmol) afforded the desired compound **19ea** as a white foam (110.1 mg, 73%) and as 2 rotamers in solution:  $[\alpha]_D = -4.0$  (c 1.09 CHCl<sub>3</sub>). IR (neat) 2928, 2810, 2241, 1696, 1452, 1391, 1258, 1165, 1131, 1046, 921, 810, 730. <sup>1</sup>HNMR (CDCl<sub>3</sub>, 400 MHz)  $\delta$  7.52 (d, *J* = 8.3 Hz, 0.4H), 7.48 (d, *J* = 8.2 Hz, 1.6H), 7.29 (d, *J* = 8.2 Hz, 2H), 5.08 (br, 0.8H), 4.98 (br, 0.2H), 4.80 (1/2AB, *J*<sub>AB</sub> = 12.5 Hz, 1H), 4.78 (1/2AB, *J*<sub>AB</sub> = 12.5 Hz, 0.2H), 4.69 (1/2AB, *J*<sub>AB</sub> = 12.5 Hz, 0.8H), 4.54 (1/2AB, *J*<sub>AB</sub> = 16.8 Hz, 0.8H), 4.38 (1/2AB, *J*<sub>AB</sub> = 16.8 Hz, 0.2H), 4.19 (dd, *J* = 16.8; 5.2 Hz, 1H), 2.38 (s, 3H), 1.66-0.90 (m, 10H), 1.46 (br s, 1.8H), 1.41 (br s, 7.2H), 1.20 (s, 6H), 1.11 (s, 3H), 1.09 (s, 3H), 0.42 (t, *J* = 6.8 Hz, 0.6H), 0.29 (t, *J* = 6.8 Hz, 2.4H). <sup>13</sup>CNMR (CDCl<sub>3</sub>, 100 MHz)  $\delta$  153.9, 153.2, 143.7, 143.0, 141.2, 140.9, 138.9, 138.8, 138.3, 129.9, 124.7, 124.0, 80.0, 79.7, 71.0, 62.6, 61.9, 60.2, 56.0, 55.8, 39.7, 34.1, 33.3, 33.2, 33.0, 30.4, 29.7, 28.4, 21.3, 20.3, 20.2, 17.0, 16.0, 15.8, 13.5. HRMS: Calc. for C<sub>29</sub>H<sub>47</sub>N<sub>2</sub>O<sub>4</sub>S [M+H]<sup>+</sup> 519.3257, found 519.3241.

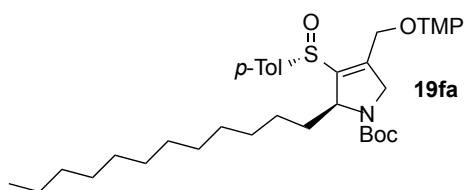

Procedure **A** with *n*-C<sub>12</sub>H<sub>25</sub> alkylidene bis-sulfoxide **1f** (136.0 mg, 0.288 mmol) afforded the desired compound **19fa** as a white foam (132.6 mg, 71%) and as 2 rotamers in solution:  $[\alpha]_D = -16.8$  (c 0.85 CHCl<sub>3</sub>). IR (neat) 2923, 2852, 2230, 1698, 1451, 1391, 1259, 1166, 1118, 1082, 1048, 991, 809, 731. <sup>1</sup>HNMR (CDCl<sub>3</sub>, 400 MHz)  $\delta$  7.48 (d, *J* = 8.0 Hz, 2H), 7.28 (d, *J* = 8.0 Hz, 2H), 5.08 (br, 0.8H), 5.00 (br, 0.2H), 4.85 (1/2AB, *J*<sub>AB</sub> = 12.4 Hz, 1H), 4.77 (1/2AB, *J*<sub>AB</sub> = 12.4 Hz, 0.2H), 4.69 (1/2AB, *J*<sub>AB</sub> = 12.4 Hz, 0.8H), 4.54 (1/2AB, *J*<sub>AB</sub> = 16.9 Hz, 0.8H), 4.38 (1/2AB, *J*<sub>AB</sub> = 16.4 Hz, 0.2H), 4.19 (dd, *J* = 16.9; 5.3 Hz, 1H), 2.38 (s, 3H), 1.72-1.64 (m, 1H), 1.60-1.50 (m, 1H), 1.46 (br s, 1.8H), 1.41 (br s, 7.2H), 1.36-1.00 (br, 30H), 1.10 (s, 3H), 1.09 (s, 3H), 0.99-0.32 (m, 2H), 0.86 (t, *J* = 6.8 Hz, 3H). <sup>13</sup>CNMR (CDCl<sub>3</sub>, 100

MHz)  $\delta$  154.0, 143.6, 141.0, 138.9, 138.5, 129.9, 124.5, 124.1, 80.2, 71.1, 62.1, 60.3, 56.0, 39.8, 33.3, 33.1, 32.1, 32.0, 29.8, 29.7, 29.5, 28.5, 22.8, 22.6, 21.4, 20.4, 20.3, 17.1, 14.3. HRMS: Calc. for  $C_{38}H_{65}N_2O_4S$   $[M+H]^+$  645.4660, found 645.4654.

### Sulfonesulfide 21.

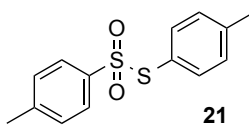

IR (neat) 2923, 1594, 1490, 1325, 1140, 1078, 1017, 808.  $^1H$ NMR ( $CDCl_3$ , 400 MHz)  $\delta$  7.46 (d,  $J = 8.3$  Hz, 2H), 7.24 (d,  $J = 8.0$  Hz, 2H), 7.21 (d,  $J = 8.3$  Hz, 2H), 7.14 (d,  $J = 8.0$  Hz, 2H), 2.42 (s, 3H), 2.38 (s, 3H).  $^{13}C$ NMR ( $CDCl_3$ , 100 MHz)  $\delta$  144.5, 142.0, 140.3, 136.5, 130.2, 129.3, 127.6, 124.5, 21.7, 21.21.4. HRMS: Calc. for  $C_{14}H_{14}O_2S_2Na$   $[M + Na]^+$  301.0327, found: 301.0331.

The spectral data for this compounds match the literature.<sup>4</sup>

### Tosylpiperidine 22.

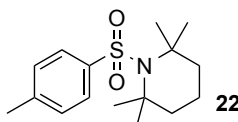

IR (neat) 2977, 2935, 1466, 1307, 1139, 1066, 986, 920, 810, 672.  $^1H$ NMR ( $CDCl_3$ , 400 MHz)  $\delta$  7.73 (d,  $J = 8.2$  Hz, 2H), 7.23 (d,  $J = 8.2$  Hz, 2H), 2.39 (s, 3H), 1.65 (s, 6H), 1.57 (s, 12H).  $^{13}C$ NMR ( $CDCl_3$ , 100 MHz)  $\delta$  144.6, 141.9, 129.3, 126.3, 60.8, 44.0, 31.2, 21.5, 16.9. HRMS: Calc. for  $C_{16}H_{25}O_2NSNa$   $[M+Na]^+$  318.1498, found 318.1497.

The spectral data for this compounds match literature.<sup>5</sup>

### Tosylslyfinyl 23.

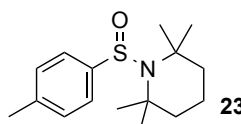

IR (neat) 2930, 1462, 1383, 1367, 1242, 1172, 1084, 1060.  $^1H$  NMR (400 MHz,  $CDCl_3$ )  $\delta$  7.55 (d,  $J = 8.3$  Hz, 2H), 7.24 (d,  $J = 7.9$  Hz, 2H), 2.39 (s, 3H), 1.83-1.28 (m, 15H), 0.93 (s, 3H).  $^{13}C$  NMR (100 MHz,  $CDCl_3$ )  $\delta$  147.3, 139.6, 129.4, 126.0, 61.3, 58.8, 43.7, 41.6, 35.5, 32.7, 31.0, 30.5, 21.3, 17.4. HRMS: Calc. for  $C_{16}H_{25}NOSNa$   $[M+Na]^+$  302.1549, found 302.1557.

The spectral data for this compounds match literature.<sup>4</sup>

<sup>4</sup> J. B. Arterburn, M. C. Perry, S. L. Nelson, B. R. Dible, M. S. Holguin, *J. Am Chem. Soc.* **1997**, *119*, 9309-9310.

<sup>5</sup> P. Carloni, E. Damiani, M. Iacussi, L. Greci, P. Stipa, *Tetrahedron* **1995**, *51*, 12445-12452.



## Preparation of cyclopentyl derivatives **25**, **26** and **27**.

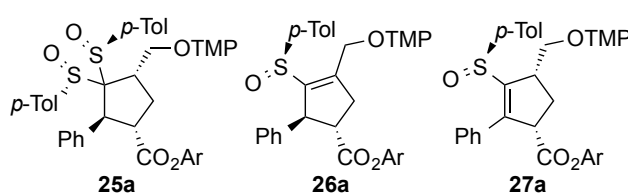

Procedure **B** with benzylidene bis-sulfoxyde **1a** (108.0 mg, 0.283 mmol) afforded a yellow oil of a 1.8:1:1.6 mixture of **25a**, **26a** and **27a** (151.8 mg, 81%). After standing 3 days in  $\text{CDCl}_3$ , it evolves to a 1:1.7 mixture of **26a/27a**: IR (neat): 2972, 2928, 1750, 1595, 1491, 1470, 1451, 1374, 1359, 1264, 1141, 1077, 1042, 917, 807, 770, 732, 701.  $^1\text{H}$ NMR ( $\text{CDCl}_3$ , 400 MHz)  $\delta$  7.70 (d,  $J = 8.3$  Hz, 2H **25a**), 7.66 (d,  $J = 8.3$  Hz, 2H **25a**), 7.60-6.85 (m, 12H **25a** + 12H **26a** + 12H **27a**), 4.99 (1/2AB,  $J_{AB} = 12.4$  Hz, 1H **26a**), 4.92 (1/2AB,  $J_{AB} = 12.4$  Hz, 1H **26a**), 4.84 (d,  $J = 4.2$  Hz, 1H **26a**), 4.55 (ddd,  $J = 9.9, 5.5, 1.1$  Hz, 1H **27a**), 4.40 (d,  $J = 12.4$  Hz, 1H **25a**), 4.34 (dd,  $J = 11.1, 7.8$  Hz, 1H **25a**), 3.94-3.86 (m, 1H **27a**), 3.80-3.71 (m, 1H **25a**), 3.56-3.51 (ddd,  $J = 12.4, 12.0, 5.6$  Hz, 1H **25a**), 3.38-3.30 (m, 1H **25a** + 1H **27a** + 3H **26a**), 3.25 (dd,  $J = 10.8, 8.8$  Hz, 1H **27a**), 2.89 (ddd,  $J = 13.5, 9.9, 9.5$  Hz, 1H **27a**), 2.83-2.77 (m, 1H **25a**), 2.46 (ddd,  $J = 13.5, 10.8, 5.5$  Hz, 1H **26a**), 2.42 (s, 3H **27a**), 2.41 (s, 3H **25a**), 2.40 (s, 3H **25a**), 2.27 (s, 3H **26a**), 2.06 (s, 6H **26a**), 2.05 (q,  $J = 12.2$  Hz, 1H **25a**), 1.84 (s, 6H **27a**), 1.80-1.55 (br, 6H **25a**), 1.52-0.89 (m, 15H **25a** + 18H **26a** + 18H **27a**), 0.71 (br s, 3H **25a**).  $^{13}\text{C}$ NMR ( $\text{CDCl}_3$ , 100 MHz)  $\delta$  171.7, 171.3, 170.9, 150.9, 148.1, 148.0, 147.4, 144.3, 142.6, 142.4, 142.2, 141.9, 141.0, 140.9, 140.6, 140.2, 139.9, 138.8, 136.2, 135.5, 135.0, 134.9, 133.2, 131.5, 130.4, 130.2, 130.1, 130.0, 129.9, 129.8, 129.7, 129.3, 128.9, 128.7, 128.6, 128.4, 128.3, 128.1, 127.5, 127.1, 126.7, 126.6, 126.3, 126.0, 125.7, 124.8, 124.4, 124.1, 88.9, 78.2, 77.4, 76.9, 72.3, 68.2, 60.2, 60.0, 59.6, 54.4, 53.4, 51.7, 50.9, 50.4, 43.5, 39.8, 39.6, 39.0, 38.3, 36.5, 33.4, 33.3, 33.2, 33.1, 32.3, 30.4, 21.7, 21.5, 21.5, 21.4, 21.3, 20.4, 20.3, 20.1, 20.0, 17.1, 16.6, 16.4, 16.2, 15.8. HRMS: **25a** Calc. for  $\text{C}_{44}\text{H}_{54}\text{NO}_5\text{S}_2$   $[\text{M}+\text{H}]^+$  740.3438, found 740.3439. HRMS: **26a/27a** Calc. for  $\text{C}_{37}\text{H}_{46}\text{NO}_4\text{S}$   $[\text{M}+\text{H}]^+$  600.3142, found 600.3141.

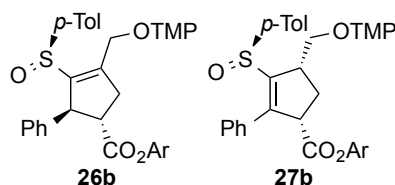

Procedure **B** with *iso*-propylidene bis-sulfoxyde **1b** (100.2 mg, 0.289 mmol) afforded a yellow foam of a 1.5:1 mixture of **26b** and **27b** (146.8 mg, 89%): IR (neat) 2927, 2870, 1750, 1595, 1373, 1359, 1131, 1092, 1042, 991, 910, 806, 768, 729.  $^1\text{H}$ NMR ( $\text{CDCl}_3$ , 400 MHz)  $\delta$  7.53 (d,  $J = 8.0$  Hz, 2H **26b**), 7.48 (d,  $J = 8.0$  Hz, 2H **27b**), 7.27 (d,  $J = 8.0$  Hz, 2H **26b**), 7.27 (d,  $J = 8.0$  Hz, 2H **27b**), 7.05 (s, 3H **27b**), 7.05 (s, 3H **26b**), 4.89 (1/2 AB,  $J_{AB} = 12.4$  Hz, 1H **26b**), 4.77 (1/2 AB,  $J_{AB} = 12.4$  Hz, 1H **26b**), 4.02 (dd,  $J = 10.3, 2.7$  Hz, 1H **27b**), 3.82 (br s, 1H **26b**), 3.64-3.57 (m, 1H **27b**), 3.45 (m, 1H **27b**), 3.27 (dd,  $J = 17.4, 2.5$  Hz, 1H **26b**), 3.19 (dd,  $J = 9.9; 1.5$  Hz, 1H **27b**), 3.03 (dd,  $J = 9.9, 4.5$  Hz, 1H **27b**), 3.14 (dt,  $J = 9.4, 2.5$  Hz, 1H **26b**), 3.00 (dd,  $J = 17.4, 9.4$  Hz, 1H **26b**), 2.60-2.49 (m, 1H **27b**), 2.43-2.38 (m, 1H **27b**), 2.39 (s, 3H **27b**), 2.37 (s, 3H **26b**), 2.18 (s, 6H **27b**), 2.10 (s, 6H **26b**), 1.83-1.74 (m, 1H **26b**), 1.52-1.00 (m, 24H **27b**), 1.47-1.10 (m, 18H **26b**), 0.94 (d,  $J = 6.8$  Hz, 3H **27b**), 0.35 (d,  $J = 6.8$  Hz, 3H **26b**).  $^{13}\text{C}$ NMR ( $\text{CDCl}_3$ , 100 MHz)  $\delta$  172.8, 172.4, 156.6, 148.0, 147.9, 146.8, 134.4, 142.1, 141.0, 140.9, 140.8, 140.6, 140.1, 139.6, 135.4, 130.1, 130.0, 129.9, 129.7, 129.6, 128.8, 128.6, 126.0, 125.5, 124.4, 124.3, 77.7, 72.3, 68.1, 60.0, 59.4, 59.2, 54.5, 49.8,

42.2, 40.3, 39.7, 39.6, 39.2, 33.2, 33.0, 32.0, 30.3, 28.9, 28.6, 22.2, 22.0, 21.5, 21.4; 21.3, 21.2; 20.3, 20.1; 19.8, 17.0, 16.8, 16.5, 15.4. HRMS: **26b/27b** Calc. for C<sub>34</sub>H<sub>48</sub>NO<sub>4</sub>S [M+H]<sup>+</sup> 566.3299, found 566.3297.

### Allylic oxidations.

Procedure **C** with *n*-propylidene bis-sulfoxide **1e** (125.1 mg, 0.361 mmol) afforded the desired compound **28e** as a yellow oil (116.7 mg, 64%) and as a 1.5:1 mixture of diastereoisomers.

Tetrahydrofuran **9e** is a side product.

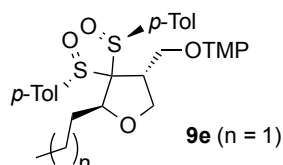

Yellowish paste.  $[\alpha]_D = -39.5$  (c 0.66 CHCl<sub>3</sub>). IR (neat) 2929, 2868, 2245, 1595, 1453, 1374, 1079, 1045, 909, 838, 807, 730. <sup>1</sup>HNMR (CDCl<sub>3</sub>, 400 MHz)  $\delta$  7.77 (d, *J* = 8.3 Hz, 2H), 7.73 (d, *J* = 8.3 Hz, 2H), 7.43 (d, *J* = 8.3 Hz, 2H), 7.40 (d, *J* = 8.3 Hz, 2H), 4.34-4.22 (m, 3H), 3.50 (dd, *J* = 10.4; 8.4 Hz, 1H), 3.26 (m, 1H), 3.04 (dd, *J* = 7.8; 3.8 Hz, 1H), 2.48 (s, 3H), 2.42 (s, 3H), 2.02-1.92 (m, 1H), 1.51-0.87 (m, 8H), 1.04 (br s 3H), 0.98 (br s, 6H), 0.62 (t, *J* = 7.4 Hz, 3H), 0.58 (br s, 3H), 0.26-0.16 (m, 1H). <sup>13</sup>CNMR (CDCl<sub>3</sub>, 100 MHz)  $\delta$  143.1, 142.8, 135.7, 135.2, 130.4, 129.9, 126.2, 126.0, 86.0, 80.2, 74.3, 72.4, 59.9, 59.6, 40.7, 39.7, 33.1, 32.9, 32.8, 21.6, 21.4, 20.0, 19.9, 17.0, 13.9. HRMS: Calc. for C<sub>31</sub>H<sub>46</sub>O<sub>4</sub>NS<sub>2</sub> [M+H]<sup>+</sup> 560.2863, found 560.2856.

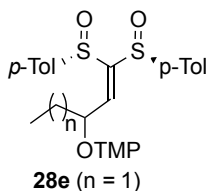

Viscous oil. dr = 1.5:1. IR (neat) 2969, 2929, 1595, 1461, 1377, 1361, 1131, 1082, 1050, 1015, 970, 805, 623. <sup>1</sup>HNMR (CDCl<sub>3</sub>, 400 MHz)  $\delta$  7.57 (d, *J* = 8.2 Hz, 1.2H), 7.22-7.19 (m, 1.2H), 7.08 (d, *J* = 8.2Hz, 1.2H), 7.06 (m, 4.2H), 6.88 (d, *J* = 7.9 Hz, 1.2H), 5.24-5.12 (m, 1H), 2.36 (s, 1.8H), 2.31 (s, 2.4H), 2.26 (s, 1.8H), 1.95-1.90 (m, 0.6H), 1.82-1.62 (m, 1.4H), 1.60-1.35 (m, 6H), 1.29 (br s, 1.2H), 1.20-1.17 (br s, 6H), 1.12-1.08 (br s, 4.8H), 0.98 (t, *J* = 7.5 Hz, 1.2H), 0.91 (br s, 1.8H). <sup>13</sup>CNMR (CDCl<sub>3</sub>, 100 MHz)  $\delta$  148.8, 148.2, 145.7, 145.0, 142.3, 142.1, 141.3, 140.8, 140.3, 139.0, 137.9, 137.4, 129.6, 129.4, 129.3, 126.3, 126.1, 125.0, 124.9, 80.6, 78.8, 61.1, 59.4, 40.5, 40.4, 40.3, 40.2, 35.0, 34.0, 33.9, 33.5, 30.4, 27.8, 27.7, 21.6, 21.5, 21.4, 20.5, 20.4, 17.3, 10.0, 9.9. HRMS: Calc. for C<sub>28</sub>H<sub>40</sub>O<sub>3</sub>NS<sub>2</sub> [M+H]<sup>+</sup> 502.2444, found 502.2438.

Procedure **C** with *n*-C<sub>12</sub>H<sub>25</sub> alkylidene bis-sulfoxide **1e** (100.0 mg, 0.211 mmol) afforded a yellow oil of **6e** (90.2 mg, 68%) as a 1.5:1 mixture of diastereoisomers.

Tetrahydrofuran **9f** is a side product.

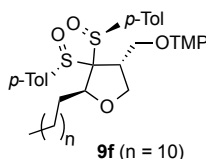

Viscous oil. dr = 5.6:1.

IR (neat) 2922, 2852, 1595, 1453, 1373, 1359, 1242, 1131, 1079, 1046, 1015, 807, 620. <sup>1</sup>HNMR (CDCl<sub>3</sub>, 400 MHz) δ 7.76 (d, *J* = 8.4 Hz, 1.7H), 7.72 (d, *J* = 8.4 Hz, 1.7H), 7.53 (d, *J* = 8.2 Hz, 0.3H), 7.49 (d, *J* = 8.2 Hz, 0.3H), 7.40 (d, *J* = 8.4 Hz, 1.7H), 7.38 (d, *J* = 8.4 Hz, 1.7H), 7.29 (d, *J* = 8.2 Hz, 0.3H), 7.22 (d, *J* = 8.2 Hz, 0.3H), 5.17-5.13 (m, 0.15H), 4.85-4.73 (m, 0.3H), 4.31-4.21 (m, 2.55H), 3.51-3.43 (m, 1H), 3.30-3.21 (m, 1H), 3.03 (dd, *J* = 7.8; 3.8 Hz, 1H), 2.46 (s, 2.55H), 2.41 (s, 2.55H), 2.39 (s, 0.45H), 2.37 (s, 0.45H), 1.98-1.86 (m, 1H), 0.57 (br s, 3H), 1.46-0.85 (m, 38H), 0.33-0.26 (m, 1H). <sup>13</sup>CNMR (CDCl<sub>3</sub>, 100 MHz) δ 143.1, 142.7, 135.7, 135.3, 130.4, 129.9, 129.4, 86.0, 85.1, 80.6, 76.4, 74.3, 72.4, 70.5, 60.2, 59.9, 59.6, 40.7, 39.7, 34.7, 33.3, 33.1, 32.9, 32.8, 32.1, 31.0, 30.4, 29.9, 29.8, 29.7, 29.6, 29.5, 29.4, 28.1, 24.5, 22.8, 21.6, 21.4, 21.3, 20.3, 20.2, 20.0, 19.9, 17.4, 17.0, 14.3. HRMS: Calc. for C<sub>40</sub>H<sub>64</sub>O<sub>4</sub>NS [M+H]<sup>+</sup> 686.4271, found 686.4268.

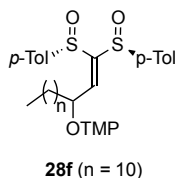

White paste. dr = 1.5:1. IR (neat): 2922, 2852, 1592, 1462, 1376, 1360, 1132, 1082, 1051, 804, 623. <sup>1</sup>HNMR (CDCl<sub>3</sub>, 400 MHz) δ 7.57 (d, *J* = 8.2 Hz, 1.2H), 7.21-7.18 (m, 1H), 7.09-6.96 (m, 5.6H), 6.87 (d, *J* = 8.0 Hz, 1.2H), 5.25-5.16 (m, 1H), 2.35 (s, 1.8H), 2.32 (s, 1.2H), 2.31 (s, 1.2H), 2.26 (s, 1.8H), 1.89-1.80 (m, 1H), 1.75-1.24 (m, 25H), 1.17 (br s, 3H), 1.16 (br s, 3H), 1.08 (br s, 3H), 0.91 (br s, 3H), 0.88 (t, *J* = 6.8 Hz, 1.2H), 0.87 (t, *J* = 6.8 Hz, 1.8H). <sup>13</sup>CNMR (CDCl<sub>3</sub>, 100 MHz) δ 148.4, 147.9, 145.9, 145.3, 142.2, 142.0, 141.3, 140.7, 140.4, 139.0, 137.9, 137.4, 79.5, 78.0, 61.0, 59.4, 40.5, 40.3, 40.2, 40.1, 35.0, 34.8, 34.6, 34.0, 33.9, 33.5, 29.9, 29.8, 29.7, 29.6, 29.5, 29.4, 25.4, 25.3, 22.7, 21.5, 21.4, 21.3, 20.5, 20.4, 17.2, 14.2. HRMS: Calc. for C<sub>37</sub>H<sub>58</sub>O<sub>3</sub>NS<sub>2</sub> [M+H]<sup>+</sup> 628.3853, found 628.3843.

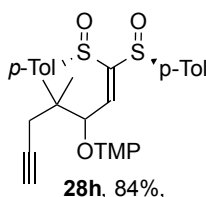

From alkylidene bis-sulfoxide **1h** (210.0 mg, 0.53 mmol) and upon addition of 1.2 equiv. Of PhCH<sub>2</sub>OLi afforded a colorless oil of **28h** (246.0 mg, 84%) as a 1.5:1 mixture of diastereoisomers. Major Diastereoisomer : [α]<sub>D</sub> + 71.5 (c = 1.0 CHCl<sub>3</sub>). IR (neat): 3307, 3238, 3092, 2971, 2929, 2241, 1491, 1466, 1051. <sup>1</sup>H NMR (CDCl<sub>3</sub>, 400MHz) δ 7.38 (d, *J* = 10.8 Hz, 1H), 7.23 (d, *J* = 8.0 Hz, 2H), 7.10 (d, *J* = 8.0 Hz, 2H), 7.02-6.98 (m, 4H), 5.32 (d, *J* = 10.8 Hz, 1H), 2.51-2.47 (m, 1H), 2.34-2.29 (m, 7H), 2.07-2.05 (m, 1H), 1.69-1.57 (m, 3H), 1.47-1.33 (m, 6H), 1.26 (s, 3H), 1.19 (s, 3H), 1.18 (s, 3H), 1.14 (s, 3H), 1.02 (s, 3H). <sup>13</sup>C NMR (CDCl<sub>3</sub>, 100MHz): δ 151.5, 141.8, 141.7, 141.4, 140.8, 136.9, 129.5, 129.3, 125.6, 125.4, 81.7, 79.7, 71.1, 61.4, 59.8, 40.4, 40.0, 39.1, 34.2, 33.6, 29.0, 23.1, 22.3, 21.3, 21.2, 20.7, 20.5, 17.1.

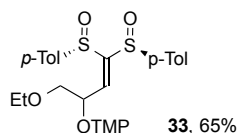

To a solution of ethanol (0.022 mL, 0.242 mmol) in anhydrous THF (2 mL), cooled to  $-10^{\circ}\text{C}$ , is added dropwise *n*-BuLi (0.130 mL, 0.260 mmol, 2.0 M in hexanes) and the solution is stirred for 30 min at this temperature. Then, the solution is cooled to  $-40^{\circ}\text{C}$  and the vinylidene bis-sulfoxide **1i** (80.0 mg, 0.242 mmol) is added as an anhydrous THF (1 mL) solution. The reaction is stirred 1 h at  $-40^{\circ}\text{C}$  and 1 h at  $-20^{\circ}\text{C}$  (disappearance of starting material monitored by TLC, diethyl ether/petroleum ether: 8/2). TEMPO (95 mg, 0.605 mmol) and ferrocenium tetrafluoroborate (231 mg, 0.847 mmol) are added in one portion. The reaction is stirred 2 hours at  $-20^{\circ}\text{C}$ , the reaction is then hydrolyzed by a saturated aqueous solution of  $\text{NH}_4\text{Cl}$ . The crude mixture is extracted with  $\text{Et}_2\text{O}$  (3x7 mL) and the resulting organic phases are dried over anhydrous  $\text{MgSO}_4$ , filtered and the solvent is removed under vacuum. The crude is purified by flash chromatography over silica gel (pentane/diethyl ether: from 9/1 to 6/4) to afford a yellow oil of **33** (83.2 mg, 65%) as a 1.2:1 mixture of diastereoisomers: IR (neat) 2972, 2927, 1595, 1454, 1376, 1360, 1114, 1082, 1049, 804, 731, 623.  $^1\text{H}$ NMR ( $\text{CDCl}_3$ , 400 MHz)  $\delta$  7.48 (d,  $J = 8.2$  Hz, 1.1H), 7.23 (d,  $J = 10.1$  Hz, 0.45H), 7.18 (d,  $J = 8.2$  Hz, 0.9H), 7.14 (d,  $J = 8.2$  Hz, 1.1H), 7.13 (d,  $J = 8.2$  Hz, 1.1H), 7.06 (d,  $J = 9.3$  Hz, 0.55H), 6.99 (d,  $J = 8.2$  Hz, 1.1H), 6.87 (d,  $J = 8.2$  Hz, 2.7H), 5.44-5.40 (m, 0.45H), 5.39-5.34 (m, 0.55H), 3.89 (dd,  $J = 9.2$ ; 4.2 Hz, 0.45H), 3.77 (dd,  $J = 10.6$ ; 5.5 Hz, 0.55H), 3.65 (dd,  $J = 10.6$ ; 5.3 Hz, 0.55H), 3.60-3.49 (m, 2.45H), 2.33 (s, 1.65H), 2.26 (br s, 2.70H), 2.25 (s, 1.65H), 1.59-1.12 (m, 18H), 1.08 (br s, 1.35H), 1.01 (br s, 1.65H).  $^{13}\text{C}$ NMR ( $\text{CDCl}_3$ , 100 MHz)  $\delta$  149.2, 143.8, 142.4, 142.2, 142.1, 140.7, 140.6, 140.3, 139.1, 137.7, 136.7, 129.4, 129.3, 129.2, 126.7, 126.5, 125.6, 124.9, 79.8, 78.3, 71.6, 71.4, 67.4, 67.2, 61.0, 60.9, 59.8, 59.7, 40.6, 40.5, 40.3, 35.3, 34.1, 33.7, 33.0, 30.4, 21.5, 21.4, 21.3, 20.7, 20.4, 17.2, 15.4, 15.3. HRMS: Calc. for  $\text{C}_{29}\text{H}_{42}\text{O}_4\text{NS}_2$   $[\text{M}+\text{H}]^+$  532.2550, found 532.2553.

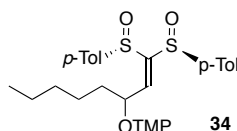

Procedure **D** with **CuI** (173 mg, 0.91 mmol), *n*-BuLi (0.395 mL, 0.91 mmol, 2.3M in hexanes) and vinylidene bis-sulfoxide **1j** (74.0 mg, 0.224 mmol) afforded a yellow oil of **12** (87 mg, 72%) as a 2.5:1 mixture of diastereoisomers: IR (neat) 2928, 2870, 1595, 1460, 1377, 1360, 1083, 1051, 805, 623.  $^1\text{H}$ NMR ( $\text{CDCl}_3$ , 400 MHz)  $\delta$  7.57 (d,  $J = 8.3$  Hz, 1.2H), 7.21-7.17 (m, 1H), 7.09-6.97 (m, 5.6H), 6.88 (d,  $J = 7.8$  Hz, 1.2H), 5.25-5.16 (m, 1 H), 2.35 (s, 1.8H), 2.32 (s, 1.2H), 2.31 (s, 1.2H), 2.26 (s, 1.8H), 1.91-1.27 (m, 14H), 1.17 (br s, 3H), 1.16 (br s, 3H), 1.08 (br s, 3H), 0.93-0.88 (m, 6H).  $^{13}\text{C}$ NMR ( $\text{CDCl}_3$ , 100 MHz)  $\delta$  148.5, 147.9, 145.9, 145.2, 142.2, 142.0, 141.3, 140.7, 140.3, 139.0, 137.8, 137.4, 129.6, 129.5, 129.3, 129.2, 126.2, 126.0, 125.0, 124.8, 79.5, 77.9, 61.0, 60.0, 40.5, 40.3, 40.2, 40.1, 35.0, 34.7, 33.9, 33.8, 33.5, 32.0, 25.0, 24.9, 22.5, 21.5, 21.4, 21.3, 20.5, 20.4, 20.3, 17.2, 14.1, 14.0. HRMS: Calc. for  $\text{C}_{31}\text{H}_{46}\text{O}_3\text{NS}_2$   $[\text{M}+\text{H}]^+$  544.2914, found 544.2906.

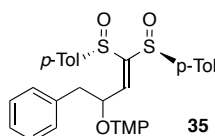

Procedure **D** with CuBr.DMS (151.7 mg, 0.738 mmol), PhLi (0.435 mL, 0.738 mmol, 1.7M in Et<sub>2</sub>O) and vinylidene bis-sulfoxide **1j** (60.9 mg, 0.184 mmol) afforded a yellow oil of **13** (59.2 mg, 57%) as a 1.8:1 mixture of diastereoisomers: IR (neat) 2972, 2928, 1595, 1493, 1454, 1376, 1361, 1181, 1132, 1083, 1052, 918, 805, 731, 700. <sup>1</sup>HNMR (CDCl<sub>3</sub>, 400 MHz) δ 7.46 (d, *J* = 8.0 Hz, 1.28H), 7.38-7.26 (m, 5H), 7.19 (d, *J* = 7.0 Hz, 0.36H), 7.08 (d, *J* = 8.3 Hz, 1.28H), 7.05 (d, *J* = 10.3 Hz, 0.64H), 6.98 (d, *J* = 8.0 Hz, 1.28H), 6.88-6.83 (m, 2.72H), 6.73 (d, *J* = 8.0 Hz, 0.72H), 6.35 (d, *J* = 8.0 Hz, 0.72), 5.45-5.35 (m, 1H), 3.34 (dd, *J* = 13.1; 4.6 Hz, 0.36H), 3.20 (dd, *J* = 13.6; 6.3 Hz, 0.64H), 2.98-2.90 (m, 1H), 2.33 (s, 1.92H), 2.28 (s, 2.16H), 2.24 (s, 1.92H), 1.59-0.96 (m, 18H). <sup>13</sup>CNMR (CDCl<sub>3</sub>, 100 MHz) δ 149.7, 148.7, 144.6, 144.3, 142.1, 141.8, 140.6, 140.5, 140.3, 138.8, 137.5, 136.6, 136.3, 136.1, 130.2, 130.1, 129.4, 129.3, 129.2, 128.8, 128.5, 127.0, 126.7, 126.3, 126.1, 124.7, 124.5, 80.5, 79.5, 61.2, 59.7, 41.3, 40.7, 40.5, 40.3, 40.2, 35.1, 34.3, 34.1, 33.8, 33.2, 30.4, 29.7, 21.5, 21.4, 21.3, 21.2, 20.7, 20.6, 20.5, 20.4, 17.2. HRMS: Calc. for C<sub>33</sub>H<sub>42</sub>O<sub>3</sub>NS<sub>2</sub> [M+H]<sup>+</sup> 564.2601, found 564.2595.

# X-ray parameters and ellipsoid plots

## Structure 17

### checkCIF/PLATON report

You have not supplied any structure factors. As a result the full set of tests cannot be run.

THIS REPORT IS FOR GUIDANCE ONLY. IF USED AS PART OF A REVIEW PROCEDURE FOR PUBLICATION, IT SHOULD NOT REPLACE THE EXPERTISE OF AN EXPERIENCED CRYSTALLOGRAPHIC REFEREE.

No syntax errors found.      CIF dictionary      Interpreting this report

### Datablock: I

---

Bond precision:    C-C = 0.0045 A                      Wavelength=0.71073

Cell:                a=28.123(6)            b=17.080(4)            c=11.050(2)  
                      alpha=90                beta=97.334(17)        gamma=90

Temperature:        200 K

|                | Calculated     | Reported       |
|----------------|----------------|----------------|
| Volume         | 5264.3(19)     | 5264(2)        |
| Space group    | C 2/c          | C 2/c          |
| Hall group     | -C 2yc         | -C 2yc         |
| Moiety formula | C27 H37 N O4 S | C27 H37 N O4 S |
| Sum formula    | C27 H37 N O4 S | C27 H37 N O4 S |
| Mr             | 471.64         | 471.63         |
| Dx,g cm-3      | 1.190          | 1.190          |
| Z              | 8              | 8              |
| Mu (mm-1)      | 0.154          | 0.154          |
| F000           | 2032.0         | 2032.0         |
| F000'          | 2033.85        |                |
| h,k,lmax       | 36,22,14       | 36,22,14       |
| Nref           | 6058           | 6045           |
| Tmin,Tmax      | 0.989,0.991    | 0.747,1.000    |
| Tmin'          | 0.919          |                |

Correction method= # Reported T Limits: Tmin=0.747 Tmax=1.000  
AbsCorr = MULTI-SCAN

Data completeness= 0.998                      Theta(max)= 27.503

R(reflections)= 0.0598( 3134)                wR2(reflections)= 0.1570( 6045)

S = 1.036                                          Npar= 303

---

The following ALERTS were generated. Each ALERT has the format  
**test-name\_ALERT\_alert-type\_alert-level.**  
Click on the hyperlinks for more details of the test.

Datablock I - ellipsoid plot

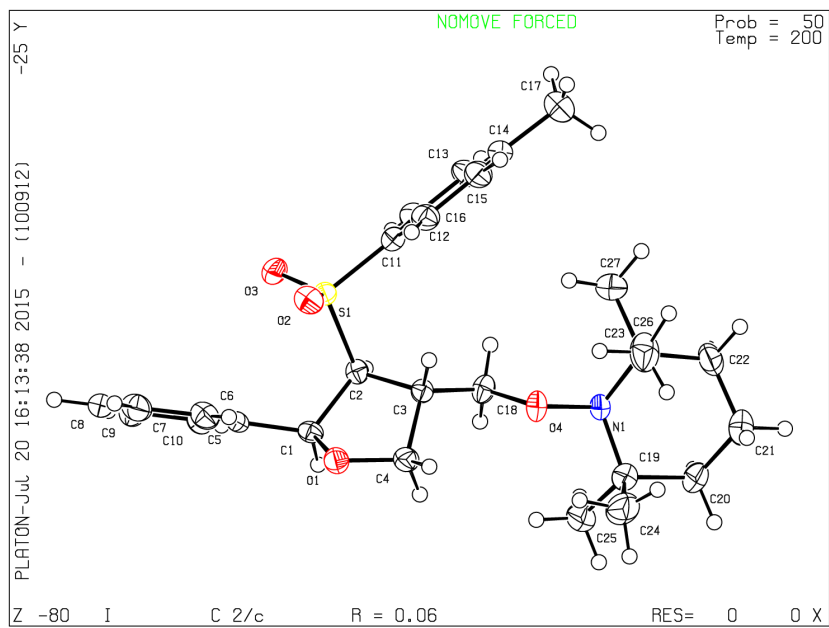

## Structure 27a

### checkCIF/PLATON report

You have not supplied any structure factors. As a result the full set of tests cannot be run.

THIS REPORT IS FOR GUIDANCE ONLY. IF USED AS PART OF A REVIEW PROCEDURE FOR PUBLICATION, IT SHOULD NOT REPLACE THE EXPERTISE OF AN EXPERIENCED CRYSTALLOGRAPHIC REFEREE.

No syntax errors found.    CIF dictionary    Interpreting this report

### Datablock: I

---

Bond precision:    C-C = 0.0062 A                    Wavelength=0.71073  
Cell:                    a=6.3790(8)            b=21.193(3)            c=25.1780(19)  
                          alpha=90                beta=90                gamma=90  
Temperature:            293 K

|                | Calculated     | Reported       |
|----------------|----------------|----------------|
| Volume         | 3403.8(7)      | 3403.8(7)      |
| Space group    | P 21 21 21     | P 21 21 21     |
| Hall group     | P 2ac 2ab      | P 2ac 2ab      |
| Moiety formula | C37 H45 N O4 S | C37 H45 N O4 S |
| Sum formula    | C37 H45 N O4 S | C37 H45 N O4 S |
| Mr             | 599.80         | 599.80         |
| Dx, g cm-3     | 1.171          | 1.170          |
| Z              | 4              | 4              |
| Mu (mm-1)      | 0.133          | 0.133          |
| F000           | 1288.0         | 1288.0         |
| F000'          | 1289.02        |                |
| h,k,lmax       | 8,27,32        | 8,27,32        |
| Nref           | 7834[ 4451]    | 7272           |
| Tmin,Tmax      | 0.983,0.989    | 0.749,1.000    |
| Tmin'          | 0.941          |                |

Correction method= # Reported T Limits: Tmin=0.749 Tmax=1.000  
AbsCorr = MULTI-SCAN

Data completeness= 1.63/0.93                    Theta(max)= 27.507

R(reflections)= 0.0513( 3431)                    wR2(reflections)= 0.1104( 7272)

S = 0.939                                            Npar= 395

---

The following ALERTS were generated. Each ALERT has the format  
**test-name\_ALERT\_alert-type\_alert-level.**  
Click on the hyperlinks for more details of the test.



Datablock I - ellipsoid plot

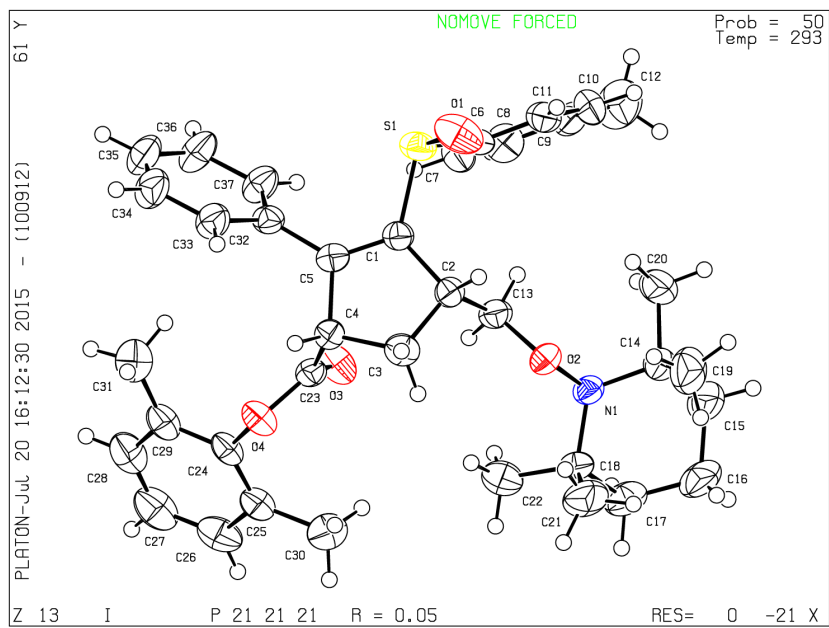

Supplement: mmc1 [file mmc1.pdf]
